# Managing bed capacity and timing of interventions: a COVID-19 model considering behavior and underreporting

Victoria May P. Mendoza<sup>a,b</sup>, Renier Mendoza<sup>a,b</sup>, Youngsuk Ko<sup>a</sup>, Jongmin Lee<sup>a</sup>, Eunok Jung<sup>a,\*</sup>

<sup>a</sup>Department of Mathematics, Konkuk University, Seoul 05029, Republic of Korea

<sup>b</sup>Institute of Mathematics, University of the Philippines Diliman 1101, Quezon City, Philippines

---

## Abstract

**Introduction:** At the start of the pandemic, the Philippine capital Metro Manila was placed under a strict lockdown termed Enhanced Community Quarantine (ECQ). When ECQ was eased to General Community Quarantine (GCQ) after three months, healthcare systems were soon faced with a surge of COVID-19 cases, putting most facilities at high or critical risk and prompting a return to a stricter policy.

**Methods:** We developed a mathematical model considering behavior changes and underreporting to represent the first major epidemic wave in Metro Manila. Key parameters were fitted to the cumulative cases in the capital from March to September 2020. A bi-objective optimization problem was formulated that allows easing of restrictions at an earlier time and minimizes the necessary additional beds to ensure sufficient capacity in healthcare facilities once ECQ was lifted.

**Results:** If behavior was changed one to four weeks earlier before GCQ, then the cumulative number of cases can be reduced by up to 55% and the peak delayed by up to four weeks. Increasing the reporting ratio during ECQ threefold may increase the reported cases by 23% but can reduce the total cases, including the unreported, by 61% on June 2020. If GCQ began on May 28, 2020, 48 beds should have been added per day to keep the capacity only at high-risk (75% occupancy). Among the optimal solutions, the peak of cases is lowest if ECQ was lifted on May 20, 2020 and with at least 56 additional beds per day.

**Conclusion:** Since infectious diseases are likely to reemerge, the formulated model can be used as a decision support tool to improve existing policies and plan effective strategies that can minimize the socioeconomic impact of strict lockdown measures and ensure adequate healthcare capacity.

*Keywords:* COVID-19, mathematical model, behavior change, underreporting, Metro Manila, Philippines, community quarantine, bi-objective optimization

---

## 1. Introduction

1        Shortly after the first local transmissions of the coronavirus disease 2019 (COVID-19) in the Philippines  
2        were confirmed, the government imposed social distancing policies, termed community quarantines, which

---

\*Corresponding author

*Email addresses:* [vmpaguio@math.upd.edu.ph](mailto:vmpaguio@math.upd.edu.ph) (Victoria May P. Mendoza), [rmendoza@math.upd.edu.ph](mailto:rmendoza@math.upd.edu.ph) (Renier Mendoza), [kys1992@konkuk.ac.kr](mailto:kys1992@konkuk.ac.kr) (Youngsuk Ko), [1jm1729@konkuk.ac.kr](mailto:1jm1729@konkuk.ac.kr) (Jongmin Lee), [kys1992@konkuk.ac.kr](mailto:kys1992@konkuk.ac.kr) (Eunok Jung)

3 were largely implemented by the police and military [1, 2]. By March 30, 2020, the country only had six  
4 laboratories that accommodated up to 1000 tests daily [3]. Contact tracing began slowly due to insufficient  
5 number of contact tracers [4]. Testing capacity was increased to about 35000 tests daily by the end of  
6 September 2020 [5]. From April to September 2020, the weekly positivity rate ranged between 4.5 and 28%,  
7 higher than the 5% threshold set by the World Health Organization during this time [6, 7].

8 The Philippines' capital region, Metro Manila, comprised around 12% of the country's population in  
9 2020 [8]. Metro Manila was placed under *Enhanced Community Quarantine* (ECQ) on March 16, 2020  
10 [9]. Under ECQ, movement was restricted to essential goods and services. Public transportation and mass  
11 gatherings were suspended [2]. People were encouraged to work from home and businesses were advised  
12 to do transactions online [1]. After two months, ECQ was replaced by the *Modified Enhanced Community*  
13 *Quarantine* (MECQ), a transition phase before easing further to *General Community Quarantine* (GCQ). On  
14 June 1, 2020, Metro Manila was placed under GCQ, where public transportation and other establishments,  
15 except those for leisure, were allowed to operate [2]. A surge in the number of cases occurred from July  
16 to August 2020 and consequently, Metro Manila was again placed under MECQ. During this time, the  
17 utilization of ICU, isolation, and ward beds in Metro Manila reached 77%, 74%, and 84%, respectively,  
18 placing most facilities on critical or high-risk and prompting 80 medical societies, representing 80000 doctors  
19 and a million nurses to demand a 'timeout' [10, 11]. On August 19, 2020, Metro Manila returned to GCQ  
20 [12]. By the end of September 2020, 53% of the 309303 total confirmed cases in the Philippines belonged to  
21 Metro Manila [5].

22 Because of the lack of vaccines and limited antiviral therapies during the early phase of the COVID-19  
23 pandemic, NPIs such as wearing of masks, school and workplace closures, and travel restrictions were crucial  
24 disease control measures. In the Philippines, compliance to policies was not only prompted by public health  
25 campaigns, but also driven by uncertainty and anxiety about the disease, and fear of getting reprimanded  
26 by the authorities [13, 14, 15]. Some of those who got infected suffered stigma and were blamed for not  
27 following the protocols [16, 17]. A study among low income households in the Philippines done in the early  
28 phase of the pandemic reported that 66% of respondents who might experience symptoms considered staying  
29 at home instead of seeking medical attention [13].

30 Non-pharmaceutical interventions and behavior change have been incorporated into mathematical models  
31 of COVID-19 [18, 19, 20, 21]. In this study, we extend the SEIQR model developed by Kim et al. [21] that  
32 includes a compartment for behavior-changed susceptible individuals. We consider a local, prevalence-based  
33 spread of fear of the disease as a factor that influences the behavior change [22]. We add an unreported  
34 compartment to account for individuals who were undetected due to inadequate testing and tracing, or  
35 unwillingness to be detected. The addition of an unreported compartment has been used in estimating  
36 unreported COVID-19 cases in various countries [23, 24, 25, 26]. It is worth noting these models did not  
37 consider behavior change similar to our approach. This study aims to investigate how the behavior and  
38 attitude of the people towards COVID-19 during the early phase of the pandemic impact the spread of

39 the disease. In particular, we are interested on the effects of reporting and behavior on the timing and  
40 magnitude of the peak of COVID-19 infections in Metro Manila, Philippines from March to September 2020.  
41 Furthermore, we present an optimization approach that allows easing from ECQ to GCQ at an earlier time  
42 and minimizes the number of additional beds necessary to ensure sufficient capacity in healthcare facilities.  
43 Since infectious diseases are likely to emerge or reemerge, there is a need to improve existing policies and  
44 plan effective strategies to minimize socioeconomic impact caused by strict community quarantine protocols  
45 and ensure that healthcare service is available to those who may need it.

## 46 2. Methods

### 47 2.1. Data

48 The number of cumulative confirmed cases from March 8 to September 30, 2020 were obtained from  
49 the Philippine Department of Health (DOH) data drop [6]. These data were used to estimate the rates of  
50 transmission, behavior change, and reporting. The data on COVID-19 bed capacity and occupancy rate in  
51 Metro Manila were gathered from the number of occupied and available isolation, ward, and ICU beds from  
52 the weekly DOH bulletin from June 20 to September 26, 2020 [33]. The total population of Metro Manila  
53 was set to 13484462, based on the 2020 census data of the Philippine Statistics Authority [8].

### 54 2.2. Mathematical model

55 The model we present is an extension of the model in [21] wherein an unreported compartment is added to  
56 represent the undetected or unreported COVID-19 cases in the early-phase of the pandemic in the Philippines.  
57 We consider seven compartments: susceptible ( $S$ ), behavior-changed susceptible ( $S_F$ ), exposed ( $E$ ), reported  
58 infectious ( $I$ ), unreported infectious ( $I_u$ ), isolated ( $Q$ ), and recovered ( $R$ ). A schematic diagram of the model  
59 is shown in Figure 1.

60 Assuming a local, prevalence-based spread of the fear of the disease and following the study of Perra et  
61 al. in [22], the transition rate of a susceptible to a behavior-changed susceptible is given by  $\beta_F Q(t)/N(t)$ .  
62 This means that a susceptible is more likely to change behavior as the number of confirmed cases among  
63 one's contacts increase. Moreover, the movement back to  $S$  is assumed to be influenced by the number  
64 of recoveries and susceptible individuals without behavior change [22]. As the recoveries and susceptible  
65 individuals increase among the contacts of a behavior-changed susceptible, the more likely the individual to  
66 exit the  $S_F$  class and resume regular social behavior. The parameter  $\mu$  represents the rate of the easing of  
67 behavior and its value is assumed to be  $1/14$  [21].

68 Susceptible individuals ( $S$  and  $S_F$ ) move to the exposed class upon contact with infectious individuals  
69 ( $I$  and  $I_u$ ) at a rate  $\beta$ . The transmission rate for the behavior-changed susceptible class is assumed to be  
70 reduced by a factor  $\delta$ . The reporting ratio  $\rho$  partitions the exposed class to reported  $I$  and unreported  $I_u$   
71 classes. Assuming that an individual becomes infectious 2 days before symptom onset [27], mean incubation  
72 period of the original virus strain is 6 days [28], and mean duration between symptom onset and the first

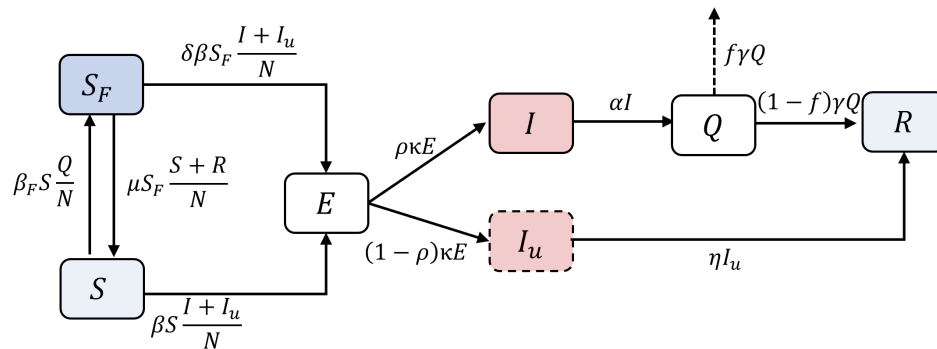

Figure 1: COVID-19 transmission model that incorporates behavior change and unreported cases. Susceptible ( $S$ ) may change behavior ( $S_F$ ) and vice versa at rates  $\beta_F$  or  $\mu$ . These classes can be exposed ( $E$ ) to the virus and become infectious ( $I, I_u$ ) in  $1/\kappa$  days on average. Transmission rate  $\beta$  is reduced by a factor  $\delta$  for behavior-changed  $S_F$ . Reporting ratio is denoted by  $\rho$ . Confirmed cases are isolated ( $Q$ ) in  $1/\alpha$  days and recover ( $R$ )  $1/\gamma$  days on average. The average fatality rate is denoted by  $f$ . Those in  $I_u$  recover  $1/\eta$  days on average.

73 medical consultation in the Philippines during this time was 6.75 days [29], we set the mean latent period  
 74 ( $1/\kappa$ ) to 4 days and mean infectious period of reported cases ( $1/\alpha$ ) to 8.75 days. From isolation, individuals  
 75 recover  $1/\gamma$  days on average or die. The average fatality rate, which is the ratio of the daily deaths to daily  
 76 active cases and denoted by  $f$ , is set to 1.9% [30]. Those in the unreported class are assumed to have less  
 77 severe symptoms and move to the recovered class  $1/\eta$  days on average. The model equations and the table  
 78 of parameters are in Appendix A.

### 79 2.3. Least-squares fitting of parameters

80 The values of the transmission rates, reporting ratio, and reduction factor were estimated from the  
 81 cumulative cases data in Metro Manila from March 8 to September 30, 2020. We divide the period into two:  
 82 period 1 is from March 8 to May 31, while period 2 is from June 1 to September 30, 2020. Metro Manila  
 83 was mostly under ECQ during period 1, while it was mostly under GCQ during period 2. It was during  
 84 period 2 that the first major epidemic wave in the Philippines occurred. Since the intensity of NPIs and  
 85 behavior of the population during ECQ and GCQ vary, the values for the transmission rates ( $\beta$  and  $\beta_F$ )  
 86 and reporting ratio ( $\rho$ ) in periods 1 and 2 are assumed to be different. The reduction in transmission ( $\delta$ ) for  
 87 the behavior-changed susceptible class is assumed to have the same value in the two periods. We denote the  
 88 transmission rates and reporting ratio for periods 1 or 2 by the subscripts 1 or 2, respectively.

89 Estimation of the parameters was done by fitting the model to the cumulative confirmed cases data at  
 90 corresponding time points using a least squares approach. That is, we minimize

$$\sum_i (\alpha I(t_i) - Y(t_i))^2,$$

91 where  $Y(t_i)$  is the total reported cases on day  $t_i$ . We utilize the Matlab built-in function `lsqcurvefit` to  
 92 obtain the parameter estimates for the best model fit.

#### 93 2.4. LHS-PRCC and parameter bootstrapping

94 Sensitivity analysis is a numerical technique that is widely used in identifying and ranking critical param-  
95 eters to a model output [31]. A parameter is said to be influential to an output if small perturbations of its  
96 value lead to significant changes in the output of the model. In this work, we use Partial Rank Correlation  
97 Coefficient (PRCC) method paired with the Latin Hypercube Sampling (LHS) technique. LHS-PRCC is one  
98 of the most efficient global sensitivity analysis techniques. To consider every infection, we use the cumulative  
99 number of infected individuals  $\kappa E$  as the model output. In the implementation of LHS, we sampled 10000  
100 combinations of the parameters, all following a uniform distribution. PRCC values of each parameter are  
101 calculated at five time points: April 19, May 31, August 2, October 4, and November 1, 2020.

102 Parameter bootstrapping is a statistical technique to quantify uncertainty and construct confidence inter-  
103 vals of estimated parameters. In this study, we utilize the algorithm introduced in [32], where large samples  
104 of synthetic data sets using the estimated model parameters are generated assuming a certain probabil-  
105 ity distribution structure. In our simulations, parameters are re-estimated from 10000 synthetic data sets  
106 each generated by assuming a Poisson error structure. The mean, standard deviation, and 95% confidence  
107 intervals of the re-estimated parameters are determined.

#### 108 2.5. Optimization problem

109 Using the bed occupancy data from the DOH [33], we calculated that an average of 16% of the active  
110 cases  $Q(t)$  occupied COVID-19 beds from June to September 2020. Fitting the weekly data on available  
111 beds, a linear function representing 75% of the bed capacity was obtained. The DOH categorizes a facility  
112 as high risk if the bed occupancy is 70% to 85%, and critical if bed occupancy is greater than 85%. From  
113 July 18 to August 8, 2020, most facilities in Metro Manila was on critical or high-risk, with a combined  
114 COVID-19 bed occupancy (isolation, ward, and ICU beds) exceeding 75% of the capacity. Here, we propose  
115 an optimization approach to determine the number of additional beds per day so that the number of cases  
116 requiring beds does not exceed 75% of the total bed capacity and if it is possible to transition from ECQ to  
117 GCQ earlier than June 1, 2020.

118 We denote by  $Q_H(t)$  the number of active cases requiring beds and  $H(t)$  the linear, time-dependent,  
119 data-fitted bed capacity. We consider two objectives:

- 120 (i) minimize the number of additional hospital beds needed per day ( $\omega$ ) so that the 75% capacity is not  
121 reached, and
- 122 (ii) determine an earlier timing ( $\tau$ ) of easing from ECQ to GCQ.

123 The problem can be formulated as a bi-objective constrained optimization problem expressed as follows:

$$\min \begin{bmatrix} \omega \\ \tau \end{bmatrix}, \quad (1)$$

124 such that

$$Q_H(t) \leq H(t; \omega, \tau) := 0.75[\omega(t - \tau) + H_0] \quad \text{for all } t, \quad (2)$$

125 where  $Q_H(t) = 0.16 \cdot Q(t)$ ,  $H_0$  is the baseline number of beds at time  $\tau$  based on the data, and  $Q(t)$  is solved  
126 from (A.1) by setting  $\tau$  as the day when GCQ started. Since this is a bi-objective optimization problem, the  
127 solution is not unique but a pareto optimal set. We solve (1)-(2) using Genetic Algorithm, which has found  
128 a growing number of applications in various fields of science and engineering [34, 35, 36]. In particular, we  
129 implement the Matlab built-in function `gamultiobj`, which is based on a variant of Non-dominated Sorting  
130 Genetic Algorithm II (NSGA-II) [37, 38].

### 131 3. Results

#### 132 3.1. Parameter Estimation

133 The best model fit for the cumulative and daily cases are shown as the black curves in Figure 2. The  
134 red circles represent the data points. The estimated transmission rates  $\beta_1$  and  $\beta_{F,1}$  in Period 1 were 0.199  
135 and 471.057, respectively. In Period 2, the transmission rate of the disease  $\beta_2$  increased to 0.361, while the  
136 transmission rate of awareness or fear of the disease  $\beta_{F,2}$  dropped to 67.783. The reporting ratio  $\rho_1$  in Period  
137 1 was estimated at 28%, which increased to 86% in Period 2. The reduction in transmission induced by  
138 behavior change  $\delta$  was estimated at 0.202. The parameter estimates are given in Table A.1.

139 The reproductive number  $\mathcal{R}(t)$ , which is the average number of secondary infections from an individual  
140 during one's infectious period, is shown as the blue curve in Figure 2. Using the next-generation matrix  
141 approach [39], it is expressed as

$$\mathcal{R}(t) = \frac{\beta\rho}{\alpha} \left( \frac{\delta S_F(t) + S(t)}{N} \right) + \frac{\beta(1-\rho)}{\eta} \left( \frac{\delta S_F(t) + S(t)}{N} \right).$$

142 Initially,  $\mathcal{R}(t)$  was at 1.9 then decreased to 0.9 by the end of Period 1. During Period 2,  $\mathcal{R}(t)$  remained  
143 above 1 from early June until mid-August, with peak of up to 1.5 in mid-July 2020.

144 Using the cumulative number of infected individuals  $\kappa E$  as the model output, results of the sensitivity  
145 analysis showed that  $\beta$  (range: 0.82 to 0.92) and  $\delta$  (range: 0.52 to 0.68) have the highest PRCC values,  
146 followed by  $\rho$  (range:  $-0.49$  to  $-0.44$ ) and the parameters for the infectious periods,  $\alpha$  (range:  $-0.48$  to  
147  $-0.46$ ) and  $\eta$  (range:  $-0.45$  to  $-0.28$ ). PRCC values of  $\kappa$  declined over time, with its highest value at 0.436.  
148 The rest of the parameters have small magnitudes of PRCC. Moreover, the parameter bootstrapping results  
149 showed that the re-estimated values of  $\beta, \beta_F, \delta$  and  $\rho$  follow a normal distribution and the mean values of  
150 the estimates all fall within their respective 95% confidence intervals. Bar plots of the PRCC at different  
151 time points are shown in Figure B.6 and the distributions of the re-estimates are shown in Figure B.7 in the  
152 Appendix.

#### 153 3.2. Effects of Behavior Change and Reporting

154 The solid curves in the upper panel of Figure 3 are the plots of the susceptible class  $S$ , while the dashed  
155 lines are the behavior-changed susceptible class  $S_F$ . Here we investigate what happens if people changed  
156 their behavior one (orange), two (yellow), three (purple), or four (green) weeks earlier. We calculated that

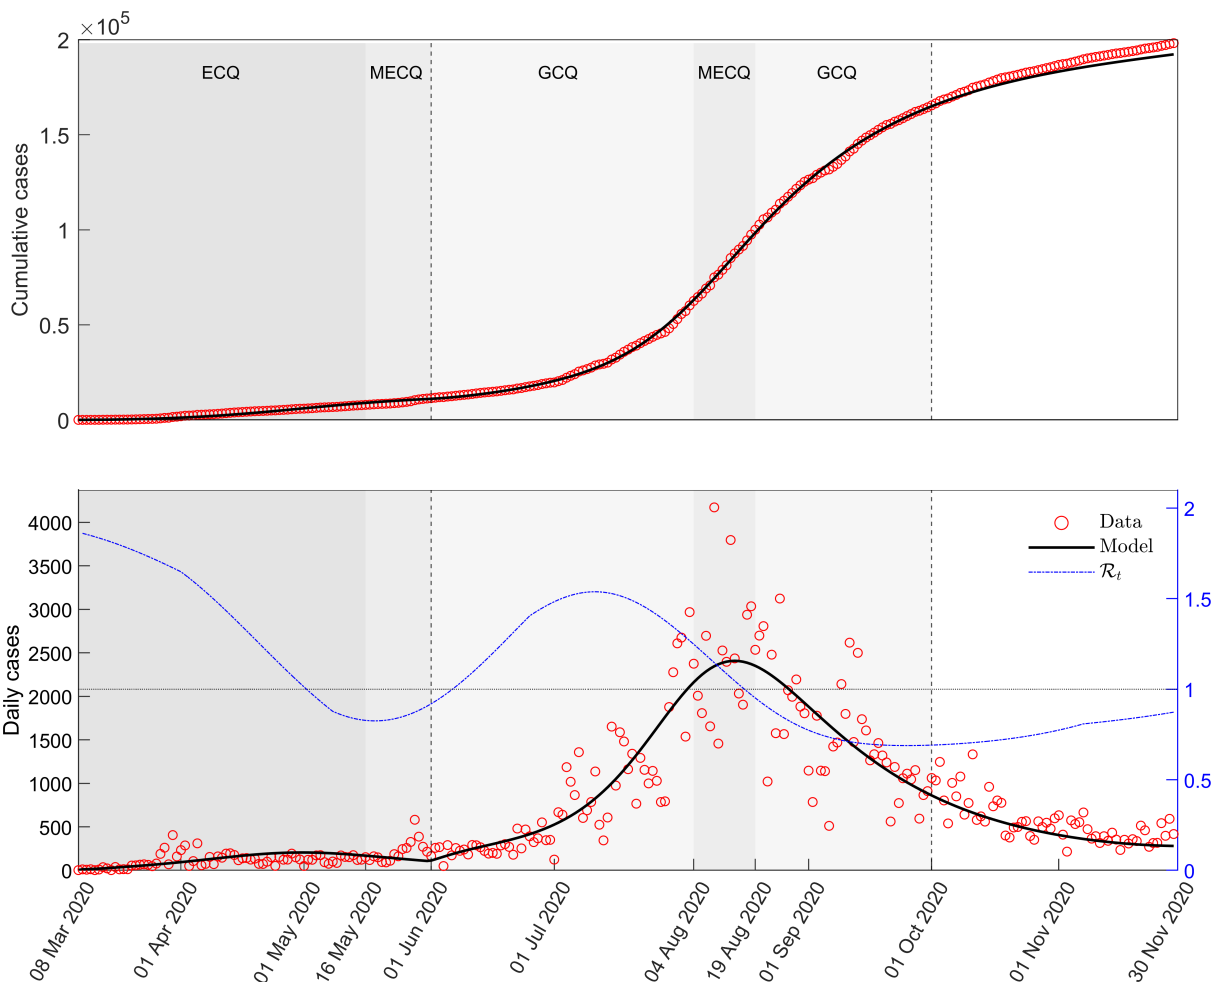

Figure 2: Best model fit to the cumulative cases from March 8 to September 30, 2020. The black curves are the plots of the cumulative cases (top) and daily cases (bottom) using the model and parameter estimates. The vertical dashed lines mark the end of Periods 1 and 2. Metro Manila was under ECQ from March 8 to May 15, 2020 (dark gray), MECQ from May 16 to May 31 and August 4 to 18, 2020 (gray), and GCQ from June 1 to August 3 and August 19 to September 30, 2020 (light gray). The red circles represent the data points and the blue curve is the reproductive number  $\mathcal{R}(t)$ .

157 at the beginning of Period 2, the proportion of  $S_F$  with respect to the total susceptible population was 88%  
 158 ( $S_F$ : 11849000;  $S$ : 1592900). To incorporate early behavior change, we scale the value of  $\beta_F$  to yield the  
 159 same proportion of  $S_F$  one to four weeks before the start of GCQ. The black curves in Figure 3 represent  
 160 the plots of the model using the parameters in Table A.1.

161 During Period 1, we observe a switch in the populations of  $S_F$  and  $S$ . By the end of Period 1,  $S_F$   
 162 comprises the majority (88%) of the susceptible classes. The impact of early behavior change is seen in  
 163 the daily and cumulative cases in Period 2, shown in the bottom panels of Figure 3. As behavior changed  
 164 one, two, three, or four weeks earlier, the cumulative cases decreased to 140468, 115573, 93041, or 73328  
 165 from 163191 (model, black), respectively. These translate to reductions of 30%, 49%, 63%, or 74% in the

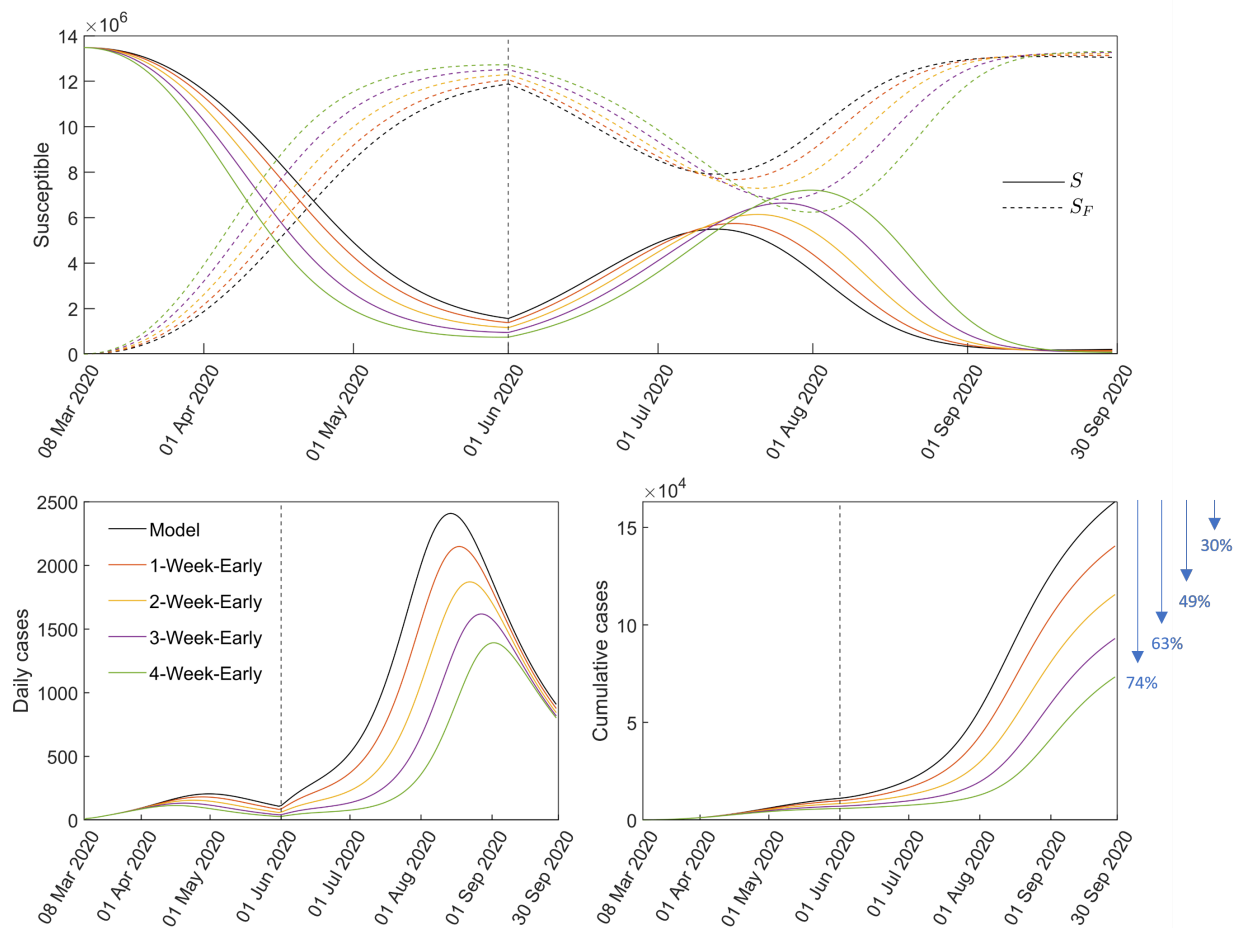

Figure 3: Dynamics of the susceptible population (top panel;  $S$  solid and  $S_F$  dashed curves), daily (lower left panel), and cumulative cases (lower right panel) if the population changed their behavior one (orange), two (yellow), three (purple), or four (green) weeks earlier than the start of Period 2.

166 cumulative cases by September 30, 2020. The peak of the daily cases also reduced to 2148, 1870, 1618, and  
 167 1392 from 2408 (model, black) and the timing was delayed from one to four weeks.

168 When the community quarantine was relaxed to GCQ, we observe that the size of  $S_F$  declined, while  $S$   
 169 increased. Around mid-July, when the number of daily cases were increasing ( $\mathcal{R}(t) > 1$ ), the behavior of  
 170 the susceptible classes switched again. From that point until the peak of the first big wave in Metro Manila  
 171 ( $\sim$ August 14 according to the model), the proportion of  $S_F$  among the susceptible classes increased from  
 172 59% to 89%.

173 The upper panels in Figure 4 show the effect of varying the values of  $\mu$  and  $\beta_F$  on the cumulative cases  
 174 and timing of the peak of infections. Higher values of  $\beta_F$  and lower factors of the behavior change ease rate  
 175  $\mu$  in Period 2 result to notable reductions in the number of cases and delay in the occurrence of the peak.  
 176 For instance, if in Period 2 we set  $\beta_{F,2}$  as 3 times  $\beta_{F,1}$  and  $\mu$  reduced by 90%, then the cumulative cases by  
 177 the end of September 2020 would have been approximately 30000 and the peak would have occurred around



178 July 25 (140 days from March 8). The blue area on the heatmap for peak timing indicates that the big wave in Period 2 did not occur until September 2020.

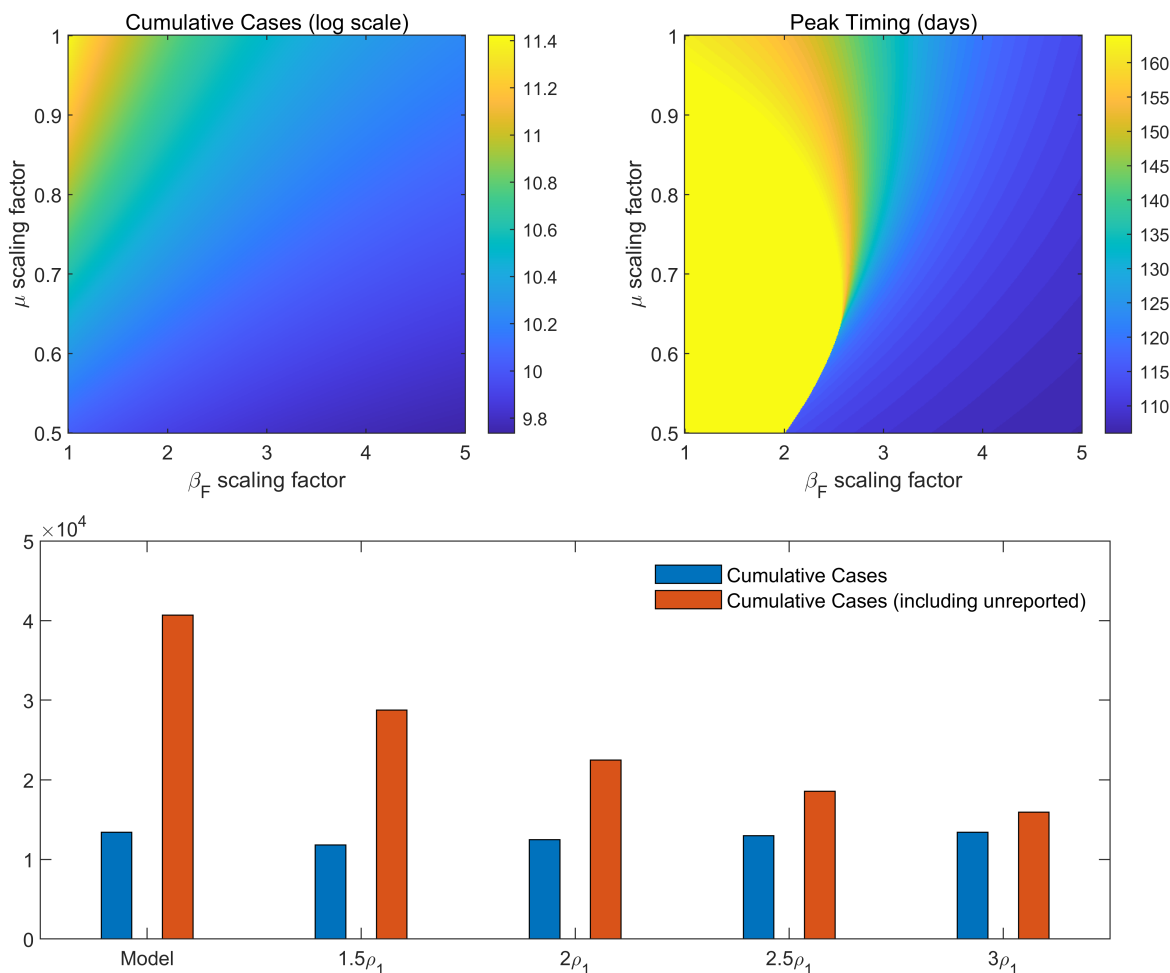

Figure 4: Effect of varying the behavior parameters ( $\mu$  and  $\beta_F$ ) in Period 2 and reporting ratio in Period 1 ( $\rho_1$ ) to the timing of the peak and cumulative cases by September 30, 2020.

179

180 Finally, the bottom panel in Figure 4 shows the effect of increasing the reporting ratio  $\rho_1$  in Period 1 on  
 181 the cumulative cases by September 30, 2020. Only slight differences in the reported cumulative cases (blue  
 182 bars; range: 11817 to 13421) were observed if  $\rho_1$  was increased by factors of 1.5, 2, 2.5, or 3. On the other  
 183 hand, cumulative cases, including the unreported (red bars), can be reduced by 29%, 45%, 54%, or 61%, if  
 184  $\rho_1$  was increased by factors of 1.5, 2, 2.5, or 3, respectively.

### 185 3.3. Optimal bed capacity and timing of policy change

186 Panel (A) in Figure 5 shows the fitted bed capacity  $H(t)$  (dashed curve) from the data (red circles) and  
 187 the number of cases requiring beds  $Q_H(t)$  from the model. Note that the red circles depict 75% of the total  
 188 COVID-19 bed capacity during this time and  $Q_H(t)$  is 16% of  $Q(t)$ , representing the average number of

189 active cases that occupy beds. By calculating the slope of  $H(t)$ , denoted by  $\omega_{\text{data}}$ , an estimated 33 beds  
 190 were added per day from June 21 to September 30, 2022 in Metro Manila. Notably,  $Q_H(t) > H(t)$  during  
 191 the second MECQ, when healthcare workers demanded a ‘timeout’. The peak of  $Q_H(t)$  was calculated at  
 5307 cases.

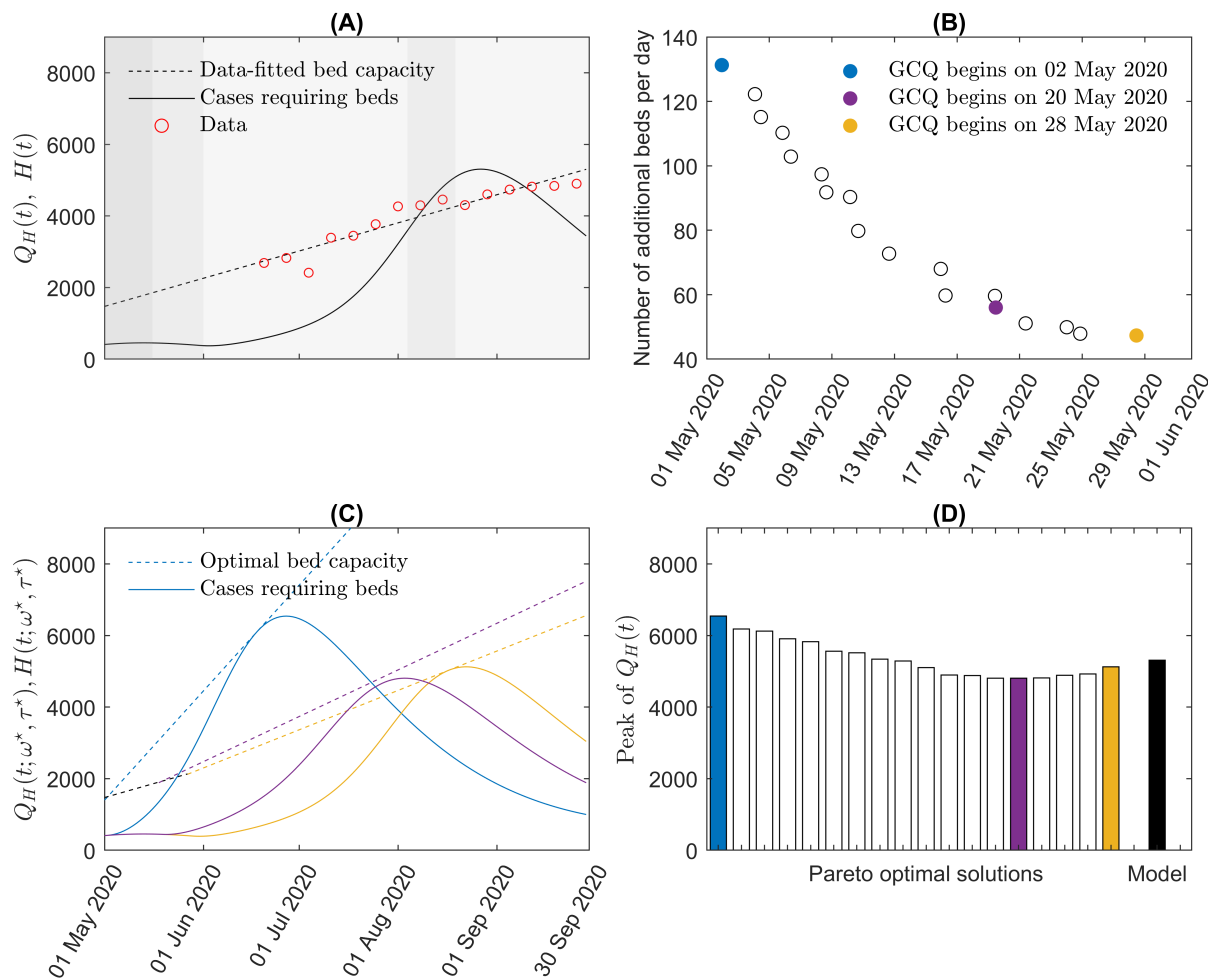

Figure 5: Pareto optimal solutions of the bi-objective optimization problem. (A) The black curve  $Q_H(t)$  is the number of cases requiring beds, calculated as 16% of the reported active cases  $Q(t)$  and the black dashed line  $H(t)$  is the bed capacity obtained by fitting the data (red circles) using linear regression. (B) Pareto optimal set of (1). (C) Plots of  $Q_H(t; \omega^*, \tau^*)$  (cases requiring beds) and the optimal hospital bed capacity  $H(t; \omega^*, \tau^*)$  corresponding to the three Pareto optimal solutions colored blue, purple, and yellow. (D) Peaks of  $Q_H(t; \omega^*, \tau^*)$  corresponding to the Pareto optimal solutions, compared to the model.

192

193 The optimal solutions of the bi-objective optimization problem in (1) form a Pareto optimal set illustrated  
 194 in Figure 5 Panel (B). The circles are all optimal solutions depicting different policies. The blue-colored  
 195 optimal solution corresponds to the earliest easing to GCQ on May 2, 2020 and requires 131 additional beds  
 196 per day to ensure that the bed capacity is adequate (up to 75% occupancy) during the surge in cases following  
 197 the lifting of restrictions (blue curves in Panel (C)). On the other hand, the yellow-colored optimal solution

198 has the least number of additional beds per day (47 beds) and latest start of GCQ (on May 28, 2020). This  
199 solution has a delayed and lower peak of infections compared to the blue Pareto optimal solution (see Panel  
200 (C)). Compared to the curves in Panel (A), the number of cases requiring beds  $Q_H(t; \omega^*, \tau^*)$  shown in Panel  
201 (C) is below the optimal bed capacity  $H(t; \omega^*, \tau^*)$ . Hence, constraint (2) of the optimization problem is  
202 satisfied. Panel (D) shows the peak sizes of the epidemic waves corresponding to the various Pareto optimal  
203 solutions. The smallest peak size (4807 cases, purple) is the optimal solution with GCQ starting on May 20,  
204 2020 and with at least 56 additional beds.

#### 205 4. Discussion

206 Using the estimated parameter values, we observe that the model captures the trend of the daily and  
207 cumulative data from March until November 2020. The model shows a small peak in the number of daily  
208 cases (204 cases) and a slow increase in cumulative cases during Period 1. A much higher peak (2408 cases)  
209 around mid-August 2020 and a sharp rise in cumulative cases is seen from the model during Period 2. A  
210 delay of about one month between the drop in  $\mathcal{R}_t$  and decline in daily cases was also observed. Results  
211 of the parameter bootstrapping suggest good reliability of the estimated parameters. Moreover, sensitivity  
212 analysis showed that the transmission rate  $\beta$  was the most sensitive parameter with respect to the number  
213 of cumulative infections. Higher reporting ratio  $\rho$  or shorter mean infectious period of reported cases  $1/\alpha$   
214 reduces the cumulative infections. These results suggest that intensifying testing and tracing efforts can  
215 effectively reduce new infections. The average latent period ( $1/\kappa$ ), which has the effect of delaying infection,  
216 becomes less sensitive to the cumulative number of infections as the epidemic progresses, while the mean  
217 infectious period of unreported cases ( $1/\eta$ ) becomes more sensitive as the epidemic progressed.

218 Reporting was low in the early pandemic phase, possibly resulting from low testing capacity, slow contact  
219 tracing, uncertainty and lack of knowledge about the disease and protocols, or fear of social stigma. This  
220 changed during Period 2, where the estimated reporting ratio went up three times. These results are consis-  
221 tent with a study on time-varying under-reporting estimates in various countries, including the Philippines,  
222 during the same period [40]. The impact of the community quarantines imposed by the government are  
223 reflected on the reduction parameter  $\delta$  and transmission rates  $\beta$  and  $\beta_F$ . The estimated 20% reduction in  
224 transmission for the behavior-changed class compares with a mathematical model of COVID-19 transmission  
225 in the Philippines which showed that the *minimum health standards* reduced the probability of transmission  
226 per contact by 13–27% [41]. As the community quarantine was relaxed from Period 1 to 2, the transmission  
227 rate of the disease ( $\beta$ ) increased from Period 1 to 2, while the rate of behavior change or transmission rate  
228 of awareness or fear of COVID-19 ( $\beta_F$ ) decreased from Period 1 to 2.

229 Results in Figures 3 and 4 emphasize the importance of early public health campaigns and positive  
230 behavior changes (e.g mask wearing, improved hygiene practices, and social distancing) on reducing and  
231 delaying the peak of infections. Although fear and stigma can influence behavior changes [42, 43], these can  
232 also affect reporting and negatively impact disease control. We see in Figure 4 that as reporting is increased,

233 total cumulative cases including the unreported decreased significantly.

234 Without vaccines and antiviral therapy, control of epidemic diseases rely on effective NPIs and man-  
235 agement of healthcare systems. The bi-objective optimization approach can be used as a decision support  
236 tool because of the multiple optimal solutions provided by the method, wherein policymakers can choose  
237 depending on how much priority given on minimizing the number of additional beds or earlier easing of  
238 restrictions. Although the method is applied to the Philippines, the optimization approach can also be used  
239 by other cities or countries by adapting location-specific epidemiological parameters. For countries with  
240 limited resources, the solutions corresponding to later easing of restrictions and less number of additional  
241 beds may be better options. On the other hand, for those that can provide sufficient additional beds, the  
242 approach can be used to identify optimal timing of adjusting NPIs. Results in Figure 5 suggest that if Metro  
243 Manila eased to GCQ on June 1, 2020, at least 47 beds per day should have been prepared so that the bed  
244 occupancy in the capital did not reach critical or high-risk, and MECQ was not needed to be reimposed.  
245 The blue solutions in Figure 5 prioritizes the earlier timing ( $\tau$ ) of easing of protocols over the number of  
246 additional beds ( $\omega$ ). With this policy, GCQ could have been started 30 days earlier. However, this requires  
247 131 additional beds per day, which is 4 times  $\omega_{\text{data}}$ . On the other hand, the yellow solutions correspond to  
248 implementing GCQ on May 29, 2020. This would require 47 additional beds per day, which is still more  
249 than  $\omega_{\text{data}}$ . In Panel (D), the policy in purple has the lowest peak among all the Pareto solutions. For this  
250 policy, even though GCQ starts on May 20 (12 days earlier than what happened), the peak of cases (purple  
251 curve in Panel (C)) was 500 less than the peak from the model (black curve in (A)). This policy would have  
252 required 56 beds per day, which is almost double than  $\omega_{\text{data}}$ .

## 253 5. Conclusion

254 In this work, we used an SEIQR model that considers behavior change and underreporting to study the  
255 spread of COVID-19 during the early phase of the pandemic in Metro Manila, Philippines. Behavior change  
256 can be influenced by awareness or fear of the disease, and willingness to observe NPIs such as social dis-  
257 tancing and mask-wearing. It was incorporated to the model by introducing a two-compartment susceptible  
258 population: one for the behavior-changed population and the other for those with regular behavior. The  
259 probability of getting infected is reduced for the behavior-changed susceptible class. Due to limited testing  
260 and tracing, or negative attitudes of people towards seeking healthcare, a compartment for the unreported  
261 cases was also added.

262 The results of this study highlight the importance of early behavior change and high reporting rate in  
263 reducing the number of cases and delaying the peak of infections. These can be done by intensifying case  
264 surveillance and public health campaigns promoting compliance to NPIs, seeking healthcare, and discour-  
265 aging social stigma. Moreover, this study provides an optimization approach that quantifies the additional  
266 bed requirement when policies are eased. The approach can be helpful in planning strategies that address  
267 strengthening or easing of policies, especially during the early phase when NPIs were the only control mea-

268 sures. Although the study focused on the transmission of COVID-19 in the Philippines, the proposed model  
269 is general enough that it can be applied to any city or country. The optimization problem can also be applied  
270 to other disease outbreaks by adjusting key epidemiological parameters. A limitation of the model is that  
271 it can only describe the early phase of the epidemic, and so for future work, the model can be extended to  
272 describe succeeding epidemic waves and incorporating vaccination, variants, attitudes and behavior of the  
273 people towards the disease, and actions done by government. Since the simulations did not consider the  
274 economic impact of NPIs, a model that maximizes economic output of a city or country while minimizing  
275 the number of infections is another work that can be pursued.

## 276 **6. Declarations**

### 277 *Acknowledgments*

278 The authors acknowledge Dr. Peter Julian Cayton of the UP Resilience Institute for his assistance with  
279 the data collection.

### 280 *Author's contributions*

281 VMPM and RM, Conceptualization, Draft preparation, Methodology, and Software. YK and JL, Con-  
282 ceptualization, Draft preparation, Methodology. EJ, Conceptualization, Draft preparation, Methodology,  
283 Project Supervision. All authors read and approved the final version of the manuscript.

### 284 *Funding*

285 This paper is supported by the Korea National Research Foundation (NRF) grant funded by the Korean  
286 government (MEST) (NRF-2021M3E5E308120711). This paper is also supported by the Korea National  
287 Research Foundation (NRF) grant funded by the Korean government (MEST) (NRF-2021R1A2C100448711).

### 288 *Disclaimer*

289 The funders played no role in the design, data collection, analysis, interpretation or writing of this study.

### 290 *Competing interest*

291 The authors declare that they have no competing interests.

### 292 *Patient and public involvement*

293 Patients and/or the public were not involved in the design, or conduct, or reporting, or dissemination  
294 plans of this research.

### 295 *Patient consent for publication*

296 Not applicable.

297 *Ethics approval*

298 Not applicable.

299 *Provenance and peer review*

300 Not commissioned; externally peer reviewed.

301 *Data availability statement*

302 The datasets supporting the conclusions of this article are available in the Department of Health COVID-  
 303 19 tracker repository in <https://doh.gov.ph/covid19tracker> and Philippine Statistics Authority High-  
 304 lights of the National Capital Region (NCR) Population 2020 Census of Population and Housing (2020 CPH)  
 305 in <https://psa.gov.ph/population-and-housing/node/165009>.

## 306 Appendix A. Model Equations

307 The following system of differential equations describe the model used in the study.

$$\begin{aligned}
 \frac{dS}{dt} &= -\beta S \frac{I + I_u}{N} + \mu S_F \frac{S + R}{N} - \beta_F S \frac{Q}{N}, \\
 \frac{dS_F}{dt} &= -\delta \beta S_F \frac{I + I_u}{N} - \mu S_F \frac{S + R}{N} + \beta_F S \frac{Q}{N}, \\
 \frac{dE}{dt} &= \delta \beta S_F \frac{I + I_u}{N} + \beta S \frac{I + I_u}{N} - \kappa E, \\
 \frac{dI}{dt} &= \rho \kappa E - \alpha I, \\
 \frac{dI_u}{dt} &= (1 - \rho) \kappa E - \eta I_u, \\
 \frac{dQ}{dt} &= \alpha I - \gamma Q, \\
 \frac{dR}{dt} &= (1 - f) \gamma Q + \eta I_u, \\
 N &= S + S_F + E + I + I_u + R.
 \end{aligned}
 \tag{A.1}$$

308 We set the initial number of infectious individuals  $I_0$ , exposed  $E_0$ , and unreported  $I_{u,0}$  equal to the number  
 309 of cases  $1/\alpha$ ,  $1/\alpha + 1/\kappa$ , and  $10 \times I_0$  days from March 8, 2020, respectively. The initial number of isolated  
 310 individuals  $Q_0$  was the number of cases at the start of the estimation period. The initial population of the  
 311  $S$  class is computed by getting the difference between the total population and  $E_0$ ,  $I_{u,0}$ ,  $I_0$ , and  $Q_0$ . The  
 312 rest of the state variables were initially set to zero. The model parameters and initial values of the state  
 313 variables are shown in Table A.1.

## 314 Appendix B. Results on sensitivity analysis and bootstrapping

315 Figure B.6 shows the PRCC for the model parameters with total infections  $\kappa E$  as the model output.  
 316 Figure B.7 shows the distributions of the parameter re-estimates. The mean, standard deviation, and  
 317 confidence intervals are also indicated in the figure.

| Symbol                     | Description (unit)                                                               | Value           | Ref        |
|----------------------------|----------------------------------------------------------------------------------|-----------------|------------|
| $\beta_1, \beta_2$         | Transmission rate of COVID-19 in Periods 1 and 2 (1/day)                         | 0.199, 0.361    | Estimated  |
| $\beta_{F,1}, \beta_{F,2}$ | Transmission rate of awareness or fear of the disease in Periods 1 and 2 (1/day) | 471.057, 68.783 | Estimated  |
| $\mu$                      | Behavior change ease rate (1/day)                                                | 1/14            | Assumed    |
| $\delta$                   | Transmission reduction factor for behavior-changed individuals                   | 0.202           | Estimated  |
| $1/\kappa$                 | Mean latent period (day)                                                         | 4               | [27, 28]   |
| $1/\alpha$                 | Mean infectious period of reported cases (day)                                   | 8.75            | [27, 29]   |
| $1/\gamma$                 | Mean recovery period (day)                                                       | 16              | [29]       |
| $f$                        | Mean fatality rate                                                               | 1.9%            | [30]       |
| $\rho_1, \rho_2$           | Reporting ratio in Periods 1 and 2                                               | 0.289, 0.866    | Estimated  |
| $1/\eta$                   | Mean infectious period of unreported cases (day)                                 | 10              | [44]       |
| $S_0$                      | Initial susceptible population                                                   | 13483232        | Calculated |
| $S_{F,0}$                  | Initial behavior-changed susceptible population                                  | 0               | Assumed    |
| $E_0$                      | Initial exposed population                                                       | 139             | Assumed    |
| $I_0$                      | Initial reported infectious population                                           | 99              | Calculated |
| $I_{u,0}$                  | Initial unreported infectious population                                         | 990             | Assumed    |
| $Q_0$                      | Initial isolated population                                                      | 2               | [6]        |
| $R_0$                      | Initial recovered population                                                     | 0               | Assumed    |

Table A.1: List of model parameters, their values, and references. The subscripts 1 and 2 denote the parameter in Periods 1 and 2, respectively.

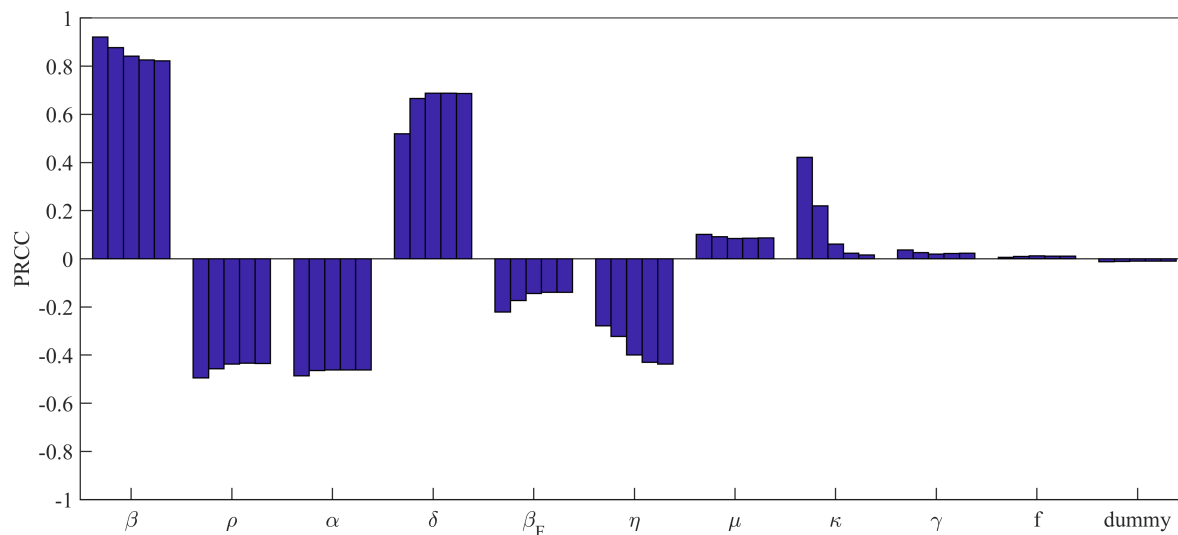

Figure B.6: PRCC values of the model parameters, with respect to the cumulative number of infected individuals  $\kappa E$ . The bars represent the PRCC values on April 19, May 31, August 2, October 4 and November 1, 2020.

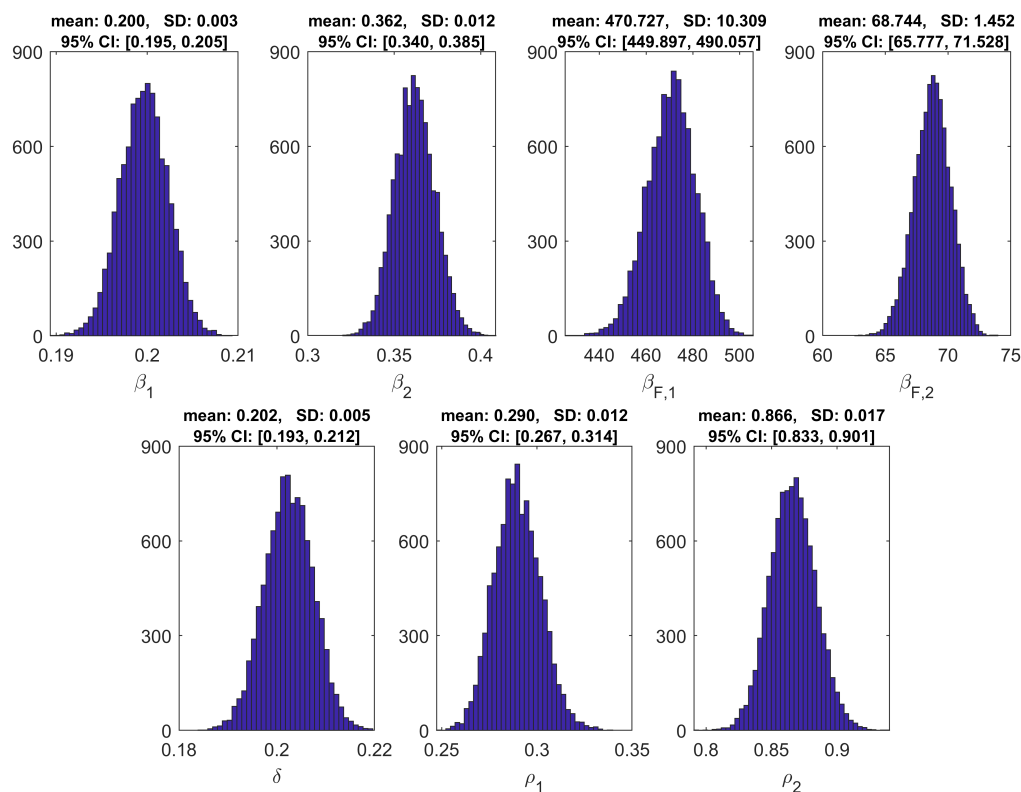

Figure B.7: Distribution of the re-estimates of  $\beta_1, \beta_2, \beta_{F,1}, \beta_{F,2}, \delta, \rho_1$  and  $\rho_2$  in the parameter bootstrapping. The mean, standard deviation (SD), and 95% confidence intervals are also shown.



318 **References**

- 319 [1] J. Vallejo, Benjamin M., R. A. C. Ong, Policy responses and government science advice for the COVID  
320 19 pandemic in the Philippines: January to April 2020, *Progress in Disaster Science* 7 (2020) 100115.  
321 doi:10.1016/j.pdisas.2020.100115.
- 322 [2] Department of Health, COVID-19 Inter-agency Task Force for the Management of Emerging Infectious  
323 Diseases Resolutions, Omnibus Guidelines on the Implementation of Community Quarantine in the  
324 Philippines (May 15, 2020), accessed: 2022-05-31.  
325 URL <https://doh.gov.ph/COVID-19/IATF-Resolutions>
- 326 [3] World Health Organization, COVID-19 in the Philippines Situation Report 12 (March 30, 2020),  
327 accessed: 2022-05-31.  
328 URL [https://www.who.int/philippines/internal-publications-detail/  
329 covid-19-in-the-philippines-situation-report-12](https://www.who.int/philippines/internal-publications-detail/covid-19-in-the-philippines-situation-report-12)
- 330 [4] B. Magsambol, PH needs 94,000 contact tracers-DOH, accessed: 2022-07-08.  
331 URL <https://www.rappler.com/nation/philippines-needs-contact-tracers>
- 332 [5] World Health Organization, COVID-19 in the Philippines Situation Report 55 (September 29, 2020),  
333 accessed: 2022-05-31.  
334 URL [https://www.who.int/philippines/internal-publications-detail/  
335 covid-19-in-the-philippines-situation-report-55](https://www.who.int/philippines/internal-publications-detail/covid-19-in-the-philippines-situation-report-55)
- 336 [6] Department of Health, COVID-19 Tracker Philippines, accessed: 2022-07-08.  
337 URL <https://doh.gov.ph/covid19tracker>
- 338 [7] D. Dowdy, G. D'Souza, COVID-19 Testing: Understanding the “Percent Positive”, accessed: 2022-07-08.  
339 URL <https://publichealth.jhu.edu/2020/covid-19-testing-understanding-the-percent-positive>
- 340 [8] P. S. Authority, 2020 Census of Population and Housing (2020 CPH) Population Counts Declared  
341 Official by the President, accessed: 2022-06-14.  
342 URL <https://psa.gov.ph/content/2020-census-population-and-housing-2020-cph-population-counts-declared-official-by-the-president>
- 343 [9] Department of Health, COVID-19 Inter-agency Task Force for the Management of Emerging Infectious  
344 Diseases Resolution No. 13 (March 17, 2020), accessed: 2022-05-31.  
345 URL <https://doh.gov.ph/COVID-19/IATF-Resolutions>
- 346 [10] Department of Health, DOH Case Bulletin No. 149 (August 10, 2020), accessed: 2022-06-14.  
347 URL <https://doh.gov.ph/node/23979>

- 348 [11] S. Tomacruz, After frontliners' plea, Duterte reverts Metro Manila to MECQ starting August 4,  
349 accessed: 2022-07-12.  
350 URL <https://www.rappler.com/nation/after-frontliners-plea-duterte-reverts-metro-manila-mecq-starti>.
- 351 [12] Department of Health, COVID-19 Inter-agency Task Force for the Management of Emerging Infectious  
352 Diseases Resolution No. 64 (August 17, 2020), accessed: 2022-06-16.  
353 URL <https://doh.gov.ph/COVID-19/IATF-Resolutions>
- 354 [13] L. L. Lau, N. Hung, D. J. Go, M. Choi, W. Dodd, X. Wei, Dramatic increases in knowledge, attitudes  
355 and practices of COVID-19 observed among low-income households in the Philippines: A repeated  
356 cross-sectional study in 2020, *Journal of Global Health* 12.
- 357 [14] K. Hapal, The Philippines' COVID-19 response: Securitising the pandemic and disciplining the pasaway,  
358 *Journal of Current Southeast Asian Affairs* 40 (2) (2021) 224–244.
- 359 [15] N. Quijano, M. C. Fernandez, A. Pangilinan, Misplaced priorities, unnecessary effects: Collective suf-  
360 fering and survival in pandemic Philippines, *Asia-Pacific Journal: Japan Focus* 18 (15) (2020) 1–15.
- 361 [16] J. C. G. Corpuz, 'We are not the virus': stigmatization and discrimination against frontline health  
362 workers, *Journal of Public Health* 43 (2) (2021) e327–e328.
- 363 [17] J. G. S. Kahambing, S. R. Edilo, Stigma, exclusion, and mental health during COVID19: 2 cases from  
364 the Philippines, *Asian Journal of Psychiatry* 54 (2020) 102292.
- 365 [18] S. Kim, Y. B. Seo, E. Jung, Prediction of COVID-19 transmission dynamics using a mathematical model  
366 considering behavior changes in Korea, *Epidemiology and health* 42.
- 367 [19] J. Lee, S.-M. Lee, E. Jung, How Important Is Behavioral Change during the Early Stages of the COVID-  
368 19 Pandemic? A Mathematical Modeling Study, *International Journal of Environmental Research and*  
369 *Public Health* 18 (18) (2021) 9855.
- 370 [20] S. Kim, Y.-J. Kim, K. R. Peck, E. Jung, School opening delay effect on transmission dynamics of  
371 coronavirus disease 2019 in Korea: based on mathematical modeling and simulation study, *Journal of*  
372 *Korean medical science* 35 (13).
- 373 [21] S. Kim, Y. Ko, Y.-J. Kim, E. Jung, The impact of social distancing and public behavior changes  
374 on COVID-19 transmission dynamics in the Republic of Korea, *PLOS ONE* 15 (9) (2020) e0238684.  
375 doi:10.1371/journal.pone.0238684.  
376 URL <http://dx.doi.org/10.1371/journal.pone.0238684>
- 377 [22] N. Perra, D. Balcan, B. Gonçalves, A. Vespignani, Towards a characterization of behavior-disease mod-  
378 els, *PloS one* 6 (8) (2011) e23084.

- 379 [23] Z. Liu, P. Magal, G. Webb, Predicting the number of reported and unreported cases for the COVID-19  
380 epidemics in China, South Korea, Italy, France, Germany and United Kingdom, *Journal of theoretical*  
381 *biology* 509 (2021) 110501.
- 382 [24] V. Deo, G. Grover, A new extension of state-space SIR model to account for Underreporting—An appli-  
383 cation to the COVID-19 transmission in California and Florida, *Results in Physics* 24 (2021) 104182.
- 384 [25] M. Melis, R. Littera, Undetected infectives in the Covid-19 pandemic, *International Journal of Infectious*  
385 *Diseases* 104 (2021) 262–268.
- 386 [26] B. Ivorra, M. R. Ferrández, M. Vela-Pérez, A. M. Ramos, Mathematical modeling of the spread of the  
387 coronavirus disease 2019 (COVID-19) taking into account the undetected infections. The case of China,  
388 *Communications in nonlinear science and numerical simulation* 88 (2020) 105303.
- 389 [27] World Health Organization et al., Transmission of SARS-CoV-2: implications for infection prevention  
390 precautions: scientific brief, 09 July 2020, Tech. rep., World Health Organization (2020).
- 391 [28] Y. Wang, R. Chen, F. Hu, Y. Lan, Z. Yang, C. Zhan, J. Shi, X. Deng, M. Jiang, S. Zhong, et al.,  
392 Transmission, viral kinetics and clinical characteristics of the emergent SARS-CoV-2 Delta VOC in  
393 Guangzhou, China, *EClinicalMedicine* 40 (2021) 101129.
- 394 [29] N. J. L. Haw, J. Uy, K. T. L. Sy, M. R. M. Abrigo, Epidemiological profile and transmission dynamics  
395 of COVID-19 in the Philippines, *Epidemiology and Infection* 148. doi:10.1017/s0950268820002137.
- 396 [30] L. Rampal, B. Liew, M. Choolani, K. Ganasegeran, A. Pramanick, S. Vallibhakara, P. Tejativaddhana,  
397 V. Hoe, Battling covid-19 pandemic waves in six south-east asian countries: A real-time consensus  
398 review, *Med J Malaysia* 75 (6) (2020) 613–625.
- 399 [31] S. Marino, I. B. Hogue, C. J. Ray, D. E. Kirschner, A methodology for performing global uncertainty  
400 and sensitivity analysis in systems biology, *Journal of Theoretical Biology* 254 (1) (2008) 178–196.  
401 doi:10.1016/j.jtbi.2008.04.011.
- 402 [32] G. Chowell, Fitting dynamic models to epidemic outbreaks with quantified uncertainty: A primer for  
403 parameter uncertainty, identifiability, and forecasts, *Infectious Disease Modelling* 2 (3) (2017) 379–398.  
404 doi:10.1016/j.idm.2017.08.001.
- 405 [33] Department of Health, Beat COVID-19 Today: A COVID-19 Philippine Situationer, accessed:  
406 2022-07-20.  
407 URL [https://drive.google.com/drive/folders/1Wxf8TbpSuWrGB0YitZCyFaG\\_NmdCooCa?usp=](https://drive.google.com/drive/folders/1Wxf8TbpSuWrGB0YitZCyFaG_NmdCooCa?usp=sharing)  
408 [sharing](https://drive.google.com/drive/folders/1Wxf8TbpSuWrGB0YitZCyFaG_NmdCooCa?usp=sharing)
- 409 [34] X.-S. Yang, Nature-inspired optimization algorithms: Challenges and open problems, *Journal of Com-*  
410 *putational Science* 46 (2020) 101104.

- 411 [35] S. Katoch, S. S. Chauhan, V. Kumar, A review on genetic algorithm: past, present, and future, Multi-  
412 media Tools and Applications 80 (5) (2021) 8091–8126.
- 413 [36] S. Sharma, V. Kumar, Application of genetic algorithms in healthcare: A review, Next Generation  
414 Healthcare Informatics (2022) 75–86.
- 415 [37] K. Deb, Multi-objective optimisation using evolutionary algorithms: an introduction, in: Multi-objective  
416 evolutionary optimisation for product design and manufacturing, Springer, 2011, pp. 3–34.
- 417 [38] K. Deb, A. Pratap, S. Agarwal, T. Meyarivan, A fast and elitist multiobjective genetic algorithm:  
418 Nsga-ii, IEEE transactions on evolutionary computation 6 (2) (2002) 182–197.
- 419 [39] O. Diekmann, J. Heesterbeek, M. G. Roberts, The construction of next-generation matrices for com-  
420 partmental epidemic models, Journal of the Royal Society Interface 7 (47) (2010) 873–885.
- 421 [40] T. W. Russell, N. Golding, J. Hellewell, S. Abbott, L. Wright, C. A. Pearson, K. van Zandvoort, C. I.  
422 Jarvis, H. Gibbs, Y. Liu, et al., Reconstructing the early global dynamics of under-ascertained covid-19  
423 cases and infections, BMC medicine 18 (1) (2020) 1–9.
- 424 [41] J. M. Caldwell, E. de Lara-Tuprio, T. R. Teng, M. R. J. E. Estuar, R. F. R. Sarmiento, M. Abayawar-  
425 dana, R. N. F. Leong, R. T. Gray, J. G. Wood, L.-V. Le, et al., Understanding covid-19 dynamics and  
426 the effects of interventions in the philippines: A mathematical modelling study, The Lancet Regional  
427 Health-Western Pacific 14 (2021) 100211.
- 428 [42] L. L. Lau, N. Hung, D. J. Go, J. Ferma, M. Choi, W. Dodd, X. Wei, Knowledge, attitudes and practices  
429 of COVID-19 among income-poor households in the Philippines: A cross-sectional study, Journal of  
430 global health 10 (1).
- 431 [43] J. Choi, K.-H. Kim, The differential consequences of fear, anger, and depression in response to covid-19  
432 in south korea, International Journal of Environmental Research and Public Health 19 (11) (2022) 6723.
- 433 [44] Center for Disease Control and Prevention, Ending Isolation and Precautions for People with COVID-  
434 19: Interim Guidance, accessed: 2022-07-08.  
435 URL <https://www.cdc.gov/coronavirus/2019-ncov/hcp/duration-isolation.html>
